# Supplementary material for: The Personalization of Conversational Agents in Health Care: Systematic Review
Source: PubMed Central journal article supplement (PMC6873147; doi:10.2196/15360), 2019-11-07
Supplement: jmir_v21i11e15360_app1.pdf [file jmir_v21i11e15360_app1.pdf]

## **Appendix 1: The Search Strategy**

### **1.1. Search strategy for MEDLINE (via PubMed interface)**

(<https://www.ncbi.nlm.nih.gov/pubmed/>)

Filters: none

Conducted in April 2017 and updated in March 2019

“Conversational agent\*” OR "conversational system\*" OR “dialog system\*” OR “dialogue system\*” OR “assistance technology” OR “assistance technologies” OR "relational agent\*" OR chatbot\*

### **1.2. Search strategy for EMBASE**

URL: Macquarie University Library (via OVID interface)

Limits: none

[mp=title, abstract, heading word, table of contents, key concepts, original title, tests & measures]

Conducted in April 2017 and updated in March 2019

Conversational agent\*.mp OR conversational system\*.mp OR dialog system\*.mp OR dialogue system\*.mp OR assistance technology.mp OR assistance technologies.mp OR relational agent\*.mp OR chatbot\*.mp

### **1.3. Search strategy for PsychINFO**

URL: Macquarie University Library (via OVID interface)

Limits: none

[mp=title, abstract, heading word, table of contents, key concepts, original title, tests & measures]

Conducted in April 2017 and updated in March 2019

Conversational agent\*.mp OR conversational system\*.mp OR dialog system\*.mp OR dialogue system\*.mp OR assistance technology.mp OR assistance technologies.mp OR relational agent\*.mp OR chatbot\*.mp

### **1.4. Search strategy for CINAHL**

URL: Macquarie University Library (via EBSCO Publishing)

Limits: none

Conducted in April 2017 and updated in March 2019

“Conversational agent\*” OR "conversational system\*" OR “dialog system\*” OR “dialogue system\*” OR “assistance technology” OR “assistance technologies” OR "relational agent\*" OR chatbot\*

### **1.5. Search strategy for ACM Digital Library**

URL: Macquarie University Library (via EBSCO Publishing)

Conducted in April 2017 and updated in March 2019

“Conversational agent\*”  
"conversational system\*"  
“dialog system\*”  
“dialogue system\*”  
"relational agent\*"  
chatbot\*
