# Supplementary material for: The Personalization of Conversational Agents in Health Care: Systematic Review
Source: PubMed Central journal article supplement (PMC6873147; doi:10.2196/15360), 2019-11-07
Supplement: jmir_v21i11e15360_app2.pdf [file jmir_v21i11e15360_app2.pdf]

## Appendix 2: The list of excluded articles

List of articles excluded after the full-text review, for not meeting inclusion criteria regarding the population, intervention, outcome, study design or personalization. Within the excluded studies, some major themes included counselling, aged-care, education, and behavior change.

### Population:

1. Green, D. and R. Cornish. *DISPLAYTRAN a graphic oriented conversational system*. in *Proceedings of the SHARE design automation project*. 1966. ACM.
2. Griol, D., J. Carbo, and J.M. Molina, *Bringing context-aware access to the web through spoken interaction*. *Applied intelligence*, 2013. **38**(4): p. 620-640.
3. Griol, D., et al., *A Two-Stage Combining Classifier Model for the Development of Adaptive Dialog Systems*. *International journal of neural systems*, 2016. **26**(01): p. 1650002.
4. Heylen, D., et al., *On the nature of engineering social artificial companions*. *Applied Artificial Intelligence*, 2011. **25**(6): p. 549-574.
5. Higuchi, S., R. Rzepka, and K. Araki. *A casual conversation system using modality and word associations retrieved from the web*. in *Proceedings of the Conference on Empirical Methods in Natural Language Processing*. 2008. Association for Computational Linguistics.
6. Hochberg, J., N. Kambhatla, and S. Roukos. *A flexible framework for developing mixed-initiative dialog systems*. in *Proceedings of the 3rd SIGdial workshop on Discourse and dialogue-Volume 2*. 2002. Association for Computational Linguistics.
7. Hoque, M.E., et al. *Mach: My automated conversation coach*. in *Proceedings of the 2013 ACM international joint conference on Pervasive and ubiquitous computing*. 2013. ACM.
8. L'Abbate, M. and U. Thiel. *Helping conversational agents to find informative responses: query expansion methods for chatterbots*. in *Proceedings of the first international joint conference on Autonomous agents and multiagent systems: part 2*. 2002. ACM.
9. Li, J., et al. *Confiding in and Listening to Virtual Agents: The Effect of Personality*. in *Proceedings of the 22nd International Conference on Intelligent User Interfaces*. 2017. ACM.
10. Litman, D., et al. *NJFun: a reinforcement learning spoken dialogue system*. in *Proceedings of the 2000 ANLP/NAACL Workshop on Conversational systems-Volume 3*. 2000. Association for Computational Linguistics.
11. Luger, E. and A. Sellen. *Like having a really bad PA: the gulf between user expectation and experience of conversational agents*. in *Proceedings of the 2016 CHI Conference on Human Factors in Computing Systems*. 2016. ACM.
12. Maier, E., N. Reithinger, and J. Alexandersson. *Clarification dialogues as measure to increase robustness in a spoken dialogue system*. in *Interactive Spoken Dialog Systems on Bringing Speech and NLP Together in Real Applications*. 1997. Association for Computational Linguistics.
13. Miner, A., et al. *Conversational Agents and Mental Health: Theory-Informed Assessment of Language and Affect*. in *Proceedings of the Fourth International Conference on Human Agent Interaction*. 2016. ACM.
14. Nederhof, M.-J., et al. *Grammatical analysis in the OVIS spoken-dialogue system*. in *Interactive Spoken Dialog Systems on Bringing Speech and NLP Together in Real Applications*. 1997. Association for Computational Linguistics.

15. O'Neill, I.M. and M.F. McTear. *An object-oriented model for the design of cross-domain dialogue systems*. in *Interactive Spoken Dialog Systems on Bringing Speech and NLP Together in Real Applications*. 1997. Association for Computational Linguistics.
16. Filichia, L., Halan, S., Blackwelder, E., Rossen, B., Lok, B., Korndorffer, J., & Cendan, J. *Description of web-enhanced virtual character simulation system to standardize patient hand-offs*. *Journal of Surgical Research*. 2011. 176-181.

**Intervention:**

17. Auriacombe M, Moriceau S, Serre F, et al. *Development and validation of a virtual agent to screen tobacco and alcohol use disorders*. *Drug and alcohol dependence* 2018;193:1-6.
18. Baker, S., D. Richards, and P. Caldwell. *Putting a New Intelligent Virtual Face on a Medical Treatment Advice System to Improve Adherence*. in *Proceedings of the 2014 Conference on Interactive Entertainment*. 2014. ACM.
19. Barker, D.J., et al., *Evaluating a spoken dialogue system for recording clinical observations during an endoscopic examination*. *Med Inform Internet Med*, 2003. **28**(2): p. 85-97.
20. Berry, D.C., L.T. Butler, and F. De Rosis, *Evaluating a realistic agent in an advice-giving task*. *International Journal of Human-Computer Studies*, 2005. **63**(3): p. 304-327.
21. Bickmore, T. and T. Giorgino, *Health dialog systems for patients and consumers*. *Journal of biomedical informatics*, 2006. **39**(5): p. 556-571.
22. Bickmore, T. and A. Gruber, *Relational agents in clinical psychiatry*. *Harvard review of psychiatry*, 2010. **18**(2): p. 119-130.
23. Bickmore, T., A. Gruber, and R. Picard, *Establishing the computer-patient working alliance in automated health behavior change interventions*. *Patient education and counseling*, 2005. **59**(1): p. 21-30.
24. Bickmore, T., D. Schulman, and L. Yin, *Maintaining engagement in long-term interventions with relational agents*. *Applied Artificial Intelligence*, 2010. **24**(6): p. 648-666.
25. Bickmore, T.W., *Relational agents: Effecting change through human-computer relationships*, 2003, Massachusetts Institute of Technology.
26. Bickmore, T.W., et al., *'It's just like you talk to a friend' relational agents for older adults*. *Interacting with Computers*, 2005. **17**(6): p. 711-735.
27. Bickmore, T.W., et al., *Response to a relational agent by hospital patients with depressive symptoms*. *Interacting with computers*, 2010. **22**(4): p. 289-298.
28. Bickmore, T.W., et al., *Usability of conversational agents by patients with inadequate health literacy: evidence from two clinical trials*. *Journal of health communication*, 2010. **15**(S2): p. 197-210.
29. Bickmore, T.W., L.M. Pfeifer, and B.W. Jack. *Taking the time to care: empowering low health literacy hospital patients with virtual nurse agents*. in *Proceedings of the SIGCHI conference on human factors in computing systems*. 2009. ACM.
30. Bickmore, T.W., L.M. Pfeifer, and M.K. Paasche-Orlow, *Using computer agents to explain medical documents to patients with low health literacy*. *Patient education and counseling*, 2009. **75**(3): p. 315-320.
31. Bickmore, T.W., et al., *Maintaining reality: relational agents for antipsychotic medication adherence*. *Interacting with Computers*, 2010. **22**(4): p. 276-288.

32. Bickmore, T.W., D. Schulman, and C. Sidner, *Automated interventions for multiple health behaviors using conversational agents*. Patient education and counseling, 2013. **92**(2): p. 142-148.
33. Bickmore, T.W., D. Schulman, and C.L. Sidner, *A reusable framework for health counseling dialogue systems based on a behavioral medicine ontology*. Journal of biomedical informatics, 2011. **44**(2): p. 183-197.
34. Bickmore, T.W., et al., *A randomized controlled trial of an automated exercise coach for older adults*. Journal of the American Geriatrics Society, 2013. **61**(10): p. 1676-1683.
35. Bickmore, T.W., et al., *Improving access to online health information with conversational agents: a randomized controlled experiment*. Journal of medical Internet research, 2016. **18**(1).
36. Black, L., et al. *DI@ L-log By Design: An Integrated Tele-Care Communication Infrastructure*. in *Engineering in Medicine and Biology Society, 2004. IEMBS'04. 26th Annual International Conference of the IEEE*. 2004. IEEE.
37. Cafaro, A., H.H. Vilhjálmsón, and T. Bickmore, *First Impressions in Human--Agent Virtual Encounters*. ACM Transactions on Computer-Human Interaction (TOCHI), 2016. **23**(4): p. 24.
38. Callejas, Z., D. Griol, and R. López-Cózar, *A framework for the assessment of synthetic personalities according to user perception*. International Journal of Human-Computer Studies, 2014. **72**(7): p. 567-583.
39. Callejas, Z. and R. Lopez-Cozar, *Influence of contextual information in emotion annotation for spoken dialogue systems*. Speech Communication, 2008. **50**(5): p. 416-433.
40. Casas J, Mugellini E, Khaled OA. *Food Diary Coaching Chatbot*. *Proceedings of the 2018 ACM International Joint Conference and 2018 International Symposium on Pervasive and Ubiquitous Computing and Wearable Computers*. Singapore, Singapore: ACM, 2018:1676-80.
41. Chinaei H, Currie LC, Danks A, Lin H, Mehta T, Rudzicz F. *Identifying and avoiding confusion in dialogue with people with alzheimer's disease*. *Comput. Linguist*. 2017;43(2):377-406.
42. Creed, C., R. Beale, and B. Cowan, *The Impact of an Embodied Agent's Emotional Expressions Over Multiple Interactions*. *Interacting with Computers*, 2014. **27**(2): p. 172-188.
43. Denecke K, Hochreutener SL, P A, #246, pel, May R. *Talking to Ana: A Mobile Self-Anamnesis Application with Conversational User Interface*. *Proceedings of the 2018 International Conference on Digital Health*. Lyon, France: ACM, 2018:85-89.
44. Fadhil A, Schiavo G, Wang Y, Yilma BA. *The Effect of Emojis when interacting with Conversational Interface Assisted Health Coaching System*. *Proceedings of the 12th EAI International Conference on Pervasive Computing Technologies for Healthcare*. New York, NY, USA: ACM, 2018:378-83.
45. Ghosh S, Bhatia S, Bhatia A. *Quro: Facilitating User Symptom Check Using a Personalised Chatbot-Oriented Dialogue System*. *Studies in health technology and informatics* 2018;252:51-56.
46. Granström, B., *The use of speech synthesis in exploring different speaking styles*. *Speech Communication*, 1992. **11**(4-5): p. 347-355.
47. Green, N. and J.F. Lehman, *An integrated discourse recipe-based model for task-oriented dialogue*. *Discourse Processes*, 2002. **33**(2): p. 133-158.

48. Griol, D. and Z. Callejas, *Mobile conversational agents for context-aware care applications*. *Cognitive Computation*, 2016. **8**(2): p. 336-356.
49. Grundy J, Mouzakis K, Vasa R, et al. *Supporting Diverse Challenges of Ageing with Digital Enhanced Living Solutions*. *Studies in health technology and informatics* 2018;246:75-90.
50. Harrefors, C., K. Axelsson, and S. Sävenstedt, *Using assistive technology services at differing levels of care: healthy older couples' perceptions*. *Journal of advanced nursing*, 2010. **66**(7): p. 1523-1532.
51. Hasegawa, S., et al. *Multilingual medical dialog system developed as smartphone/tablet application*. in *Engineering in Medicine and Biology Society (EMBC), 2013 35th Annual International Conference of the IEEE*. 2013. IEEE.
52. Ho A, Hancock J, Miner AS. *Psychological, Relational, and Emotional Effects of Self-Disclosure After Conversations with a Chatbot*. *The Journal of communication* 2018;68(4):712-33.
53. Holter, M.T., A. Johansen, and H. Brendryen, *How a fully automated eHealth program simulates three therapeutic processes: a case study*. *Journal of medical Internet research*, 2016. **18**(6).
54. Hsu P, Zhao J, Liao K, Liu T, Wang C. *AllergyBot: A Chatbot Technology Intervention for Young Adults with Food Allergies Dining Out*. *Proceedings of the 2017 CHI Conference Extended Abstracts on Human Factors in Computing Systems*. Denver, Colorado, USA: ACM, 2017:74-79.
55. Hubal, R.C., et al., *How do varied populations interact with embodied conversational agents? Findings from inner-city adolescents and prisoners*. *Computers in human behavior*, 2008. **24**(3): p. 1104-1138.
56. Jack, B., et al., *Reducing preconception risks among African American women with conversational agent technology*. *The Journal of the American Board of Family Medicine*, 2015. **28**(4): p. 441-451.
57. Kim, J.H., et al., *A web-based rapid prototyping and clinical conversational system that complements electronic patient record system*. *Medinfo*, 2001. **10**: p. 628-632.
58. Korpusik M, Glass J, Korpusik M, Glass J. *Spoken Language Understanding for a Nutrition Dialogue System*. *IEEE/ACM Trans. Audio, Speech and Lang. Proc.* 2017;25(7):1450-61.
59. López, B., et al. *Design and validation of ECA gestures to improve dialogue system robustness*. in *Proceedings of the Workshop on Embodied Language Processing*. 2007. Association for Computational Linguistics.
60. Lacson, R., *The medical appointment scheduler*. *Studies in health technology and informatics*, 2004. **107**(Pt 2): p. 969.
61. Lin, C.-J., et al., *Ellipsis and Coreference Resolution in a Computerized Virtual Patient Dialogue System*. *Journal of medical systems*, 2016. **40**(9): p. 206.
62. Lisetti, C., et al., *I can help you change! an empathic virtual agent delivers behavior change health interventions*. *ACM Transactions on Management Information Systems (TMIS)*, 2013. **4**(4): p. 19.
63. Mairitha T, Okita T, Inoue S. *Pre-Consulting Dialogue Systems for Telemedicine: Yes/No Intent Classification*. *Proceedings of the 2018 ACM International Joint Conference and 2018 International Symposium on Pervasive and Ubiquitous Computing and Wearable Computers*. Singapore, Singapore: ACM, 2018:742-45.
64. Martin J-C, Lescanff C, Rosset S, Walker M, Whittaker S. *How to Personalize Conversational Coaches for Stress Management?* *Proceedings of the 2018 ACM*

- International Joint Conference and 2018 International Symposium on Pervasive and Ubiquitous Computing and Wearable Computers. Singapore, Singapore: ACM, 2018:718-21.
65. McRoy, S., et al. *An open architecture for messaging-based consumer-health question-answering*. in *Proceedings of the 2nd ACM SIGHIT International Health Informatics Symposium*. 2012. ACM.
  66. Mehrotra, S., et al. *Embodied Conversational Interfaces for the Elderly User*. in *Proceedings of the 8th Indian Conference on Human Computer Interaction*. 2016. ACM.
  67. Morris RR, Kouddous K, Kshirsagar R, Schueller SM. *Towards an Artificially Empathic Conversational Agent for Mental Health Applications: System Design and User Perceptions*. *Journal of medical Internet research* 2018;20(6):1-1.
  68. Na, #273, Terzimehi a, et al. *Lunchocracy: Improving Eating Dynamics in the Workplace Using a Bot-Based Anonymous Voting System*. *Extended Abstracts of the 2018 CHI Conference on Human Factors in Computing Systems*. Montreal QC, Canada: ACM, 2018:1-6.
  69. Novielli, N., et al., *Analysing user's reactions in advice-giving dialogues with a socially intelligent ECA*. *Cognitive processing*, 2012. **13**(2): p. 487-497.
  70. Pickard, M.D., *Persuasive embodied agents: Using embodied agents to change people's behavior, beliefs, and assessments*2012: The University of Arizona.
  71. Pirolli P, Youngblood G, Du H, Konrad A, Nelson L, Springer A. *Scaffolding the mastery of healthy behaviors with fittle+ systems: Evidence-based interventions and theory*. *Human-Computer Interaction* 2018
  72. Puskar, K., et al., *Relational agents as an adjunct in schizophrenia treatment*. *Journal of psychosocial nursing and mental health services*, 2011. **49**(8): p. 22-29.
  73. Richards D, Caldwell P. *Improving Health Outcomes Sooner Rather Than Later via an Interactive Website and Virtual Specialist*. *IEEE journal of biomedical and health informatics* 2018;22(5):1699-706.
  74. Ring, L., T. Bickmore, and P. Pedrelli, *Real-Time Tailoring of Depression Counseling by Conversational Agent*. *Iproceedings*, 2016. **2**(1): p. e27.
  75. de Rosis, F., et al., *User modeling and adaptation in health promotion dialogs with an animated character*. *Journal of biomedical informatics*, 2006. **39**(5): p. 514-531.
  76. Sakpal, R. *Virtual patients to teach cultural competency*. in *Proceedings of the 14th ACM international conference on Multimodal interaction*. 2012. ACM.
  77. Shamekhi, A., et al. *A Virtual Self-care Coach for Individuals with Spinal Cord Injury*. in *Proceedings of the 18th International ACM SIGACCESS Conference on Computers and Accessibility*. 2016. ACM.
  78. Sidner CL, Bickmore T, Nooraie B, et al. *Creating New Technologies for Companionable Agents to Support Isolated Older Adults*. *ACM Trans. Interact. Intell. Syst.* 2018;8(3):1-27 doi: 10.1145/3213050
  79. Simon, S.R., et al. *A Pilot Study Of A Computer-Based Relational Agent To Screen For Substance-Use Problems In Primary Care*. In *Journal Of General Internal Medicine*. 2013. Springer 233 Spring St, New York, Ny 10013 Usa.
  80. Sinoo C, van der Pal S, Blanson Henkemans OA, et al. *Friendship with a robot: Children's perception of similarity between a robot's physical and virtual embodiment that supports diabetes self-management*. *Patient education and counseling* 2018
  81. Soller, R.W., P. Chan, and A. Higa, *Performance of a new speech translation device in translating verbal recommendations of medication action plans for patients with diabetes*. *Journal of diabetes science and technology*, 2012. **6**(4): p. 927-937.

82. Suganuma S, Sakamoto D, Shimoyama H. *An Embodied Conversational Agent for Unguided Internet-Based Cognitive Behavior Therapy in Preventative Mental Health: Feasibility and Acceptability Pilot Trial*. JMIR mental health 2018;5(3):e10454 doi: 10.2196/10454.
83. Sun O, Chen J, Magrabi F. *Using Voice-Activated Conversational Interfaces for Reporting Patient Safety Incidents: A Technical Feasibility and Pilot Usability Study*. Studies in health technology and informatics 2018;252:139-44.
84. Tiwari, P., J. Warren, and K. Day. *Empowering older patients to engage in self care: designing an interactive robotic device*. in *AMIA Annual Symposium Proceedings*. 2011. American Medical Informatics Association.
85. Waller, A., et al., *Evaluating the use of TalksBac, a predictive communication device for nonfluent adults with aphasia*. International Journal of Language & Communication Disorders, 1998. **33**(1): p. 45-70.
86. Wang, C., et al., *Acceptability and feasibility of a virtual counselor (VICKY) to collect family health histories*. Genetics in medicine: official journal of the American College of Medical Genetics, 2015. **17**(10): p. 822.
87. Wang V, Wexler S, Drury L, Wang B. *A Protocol-Driven, Digital Conversational Agent at the Hospital Bedside to Support Nurse Teams and to Mitigate Delirium and Falls Risk*. Journal of medical Internet research 2018;20(9):3-3.
88. Wargnier P, Benveniste S, Jouvelot P, Rigaud AS. Usability assessment of interaction management support in LOUISE, an ECA-based user interface for elders with cognitive impairment. Technology and Disability 2018;30(3):105-26
89. Wells, K.J., et al., *Acceptability of a virtual patient educator for hispanic women*. Hispanic Health Care International, 2015. **13**(4): p. 179-185.
90. Wong, W., J. Thangarajah, and L. Padgham. *Health conversational system based on contextual matching of community-driven question-answer pairs*. in *Proceedings of the 20th ACM international conference on Information and knowledge management*. 2011. ACM.
91. Wright-Berryman, J.L., et al., *Consumer and provider responses to a computerized version of the Illness Management and Recovery Program*. Psychiatric rehabilitation journal, 2013. **36**(4): p. 231.
92. Xu, J., et al., *Design challenges and guidelines for persuasive technologies that facilitate healthy lifestyles*. Computer technology and application, 2012. **3**(2): p. 140.
93. Zhang Z, Bickmore T. *Medical Shared Decision Making with a Virtual Agent*. *Proceedings of the 18th International Conference on Intelligent Virtual Agents*. Sydney, NSW, Australia: ACM, 2018:113-18.
94. Zhang, Z., T.W. Bickmore, and M.K. Paasche-Orlow, *Perceived organizational affiliation and its effects on patient trust: Role modeling with embodied conversational agents*. Patient Education and Counseling, 2017.
95. Zhou, S., et al. *Afraid to ask: proactive assistance with healthcare documents using eye tracking*. in *Proceedings of the extended abstracts of the 32nd annual ACM conference on Human factors in computing systems*. 2014. ACM.
96. van der Zwaan, J.M. and V. Dignum. *Robin, an empathic virtual buddy for social support*. in *Proceedings of the 2013 international conference on Autonomous agents and multi-agent systems*. 2013. International Foundation for Autonomous Agents and Multiagent Systems.

**Outcome:**

97. Allen, J., et al., *Chester: towards a personal medication advisor*. Journal of biomedical informatics, 2006. **39**(5): p. 500-513.
98. Azzini, I., et al., *Automated spoken dialog system for home care and data acquisition from chronic patients*. Studies in health technology and informatics, 2003. **95**: p. 146-151.
99. Bickmore, T. *Towards the design of multimodal interfaces for handheld conversational characters*. in *CHI'02 extended abstracts on Human factors in computing systems*. 2002. ACM.
100. Bickmore, T. and J. Cassell. *Relational agents: a model and implementation of building user trust*. in *Proceedings of the SIGCHI conference on Human factors in computing systems*. 2001. ACM.
101. Bohle S. "Plutchik": *Artificial intelligence chatbot for searching NCBI databases*. Journal of the Medical Library Association 2018;106(4):501-03 doi: 10.5195/jmla.2018.500.
102. Clavel I, Whittaker S, et al. WENner: A Theoretically Motivated Approach for Tailored Coaching about Physical Activity. Proceedings of the International Symposium on Pervasive and Ubiquitous Computing and Wearable Computers. Singapore, Singapore: ACM, 2018:1669-75.
103. Fadhil A, Gabrielli S. *Addressing challenges in promoting healthy lifestyles: the al-chatbot approach*. Proceedings of the 11th EAI International Conference on Pervasive Computing Technologies for Healthcare. Barcelona, Spain: ACM, 2017:261-65.
104. Gabrielli S, Marie K, Corte CD. *SLOWBot (chatbot) Lifestyle Assistant*. Proceedings of the 12th EAI International Conference on Pervasive Computing Technologies for Healthcare. New York, NY, USA: ACM, 2018:367-70.
105. Gumede, T. and M. Plauché. *Initial fieldwork for LWAZI: a telephone-based spoken dialog system for rural South Africa*. in *Proceedings of the First Workshop on Language Technologies for African Languages*. 2009. Association for Computational Linguistics.
106. Haimowitz, I.J., *Modeling all dialogue system participants to generate empathetic responses*. Computer Methods and Programs in Biomedicine, 1991. **35**(4): p. 321-330.
107. Kamali ME, Angelini L, Caon M, Andreoni G, Khaled OA, Mugellini E. *Towards the NESTORE e-Coach: a Tangible and Embodied Conversational Agent for Older Adults*. Proceedings of the 2018 ACM International Joint Conference and 2018 International Symposium on Pervasive and Ubiquitous Computing and Wearable Computers. Singapore, Singapore: ACM, 2018:1656-63.
108. Kim J, Kim Y, Kim B, Yun S, Kim M, Lee J. *Can a Machine Tend to Teenagers' Emotional Needs?: A Study with Conversational Agents*. Extended Abstracts of the 2018 CHI Conference on Human Factors in Computing Systems. Montreal QC, Canada: ACM, 2018:1-6.
109. Knuepffer, C. *Chat-Bots for People with Parkinson's Disease: Science Fiction or Reality?* in *Driving Reform: Digital Health is Everyone's Business: Selected Papers from the 23rd Australian National Health Informatics Conference (HIC 2015)*. 2015. IOS Press.
110. Loisel, A., N. Chaignaud, and J.-P. Kotowicz. *Designing a Human-Computer Dialog System for Medical Information Search*. in *Proceedings of the 2007 IEEE/WIC/ACM International Conferences on Web Intelligence and Intelligent Agent Technology-Workshops*. 2007. IEEE Computer Society.

111. Motalebi N, Abdullah S. *Conversational Agents to Provide Couple Therapy for Patients with PTSD. Proceedings of the 12th EAI International Conference on Pervasive Computing Technologies for Healthcare*. New York, NY, USA: ACM, 2018:347-51.
112. Papangelis, A., F. Makedon, and R. Gatchel, *Assessing and Monitoring Post-Traumatic Stress Disorder Through Natural Interaction With an Adaptive Dialogue System*. *Journal of Applied Biobehavioral Research*, 2014. **19**(3): p. 192-215.
113. Pasikowska, A., A. Zaraki, and N. Lazzeri. *A dialogue with a virtual imaginary interlocutor as a form of a psychological support for well-being*. in *Proceedings of the International Conference on Multimedia, Interaction, Design and Innovation*. 2013. ACM.
114. Pérez-Marín, D. and I. Pascual-Nieto, *An exploratory study on how children interact with pedagogic conversational agents*. *Behaviour & Information Technology*, 2013. **32**(9): p. 955-964.
115. Pilato, G., R. Pirrone, and R. Rizzo, *A kst-based system for student tutoring*. *Applied Artificial Intelligence*, 2008. **22**(4): p. 283-308.
116. Skowron, M., et al., *Applying a text-based affective dialogue system in psychological research: case studies on the effects of system behaviour, interaction context and social exclusion*. *Cognitive Computation*, 2014. **6**(4): p. 872-891.
117. Terzis, V., C.N. Moridis, and A.A. Economides, *The effect of emotional feedback on behavioral intention to use computer based assessment*. *Computers & Education*, 2012. **59**(2): p. 710-721.
118. Vaira L, Bochicchio MA, Conte M, Casaluci FM, Melpignano A. *MamaBot: A System based on ML and NLP for supporting Women and Families during Pregnancy. Proceedings of the 22nd International Database Engineering & Applications Symposium*. Villa San Giovanni, Italy: ACM, 2018:273-77.

#### Study design:

119. Johnson, L. *Interaction with embodied conversational agents*. in *Proceedings of the 10th international conference on Intelligent user interfaces*. 2005. ACM.
120. Kavakli, M., et al., *Tools for eMental-Health: A Coping Processor for Adaptive and Interactive Mobile Systems for Stress Management*, in *Integrating Technology in Positive Psychology Practice 2016*, IGI Global. p. 127-160.
121. Kramer JN, Kunzler F, Mishra V, et al. *Investigating Intervention Components and Exploring States of Receptivity for a Smartphone App to Promote Physical Activity: Protocol of a Microrandomized Trial*. *JMIR research protocols* 2019;**8**(1):e11540 doi: 10.2196/11540
122. Lisetti, C., *Features for culturally appropriate avatars for behavior-change promotion in at-risk populations*. *Stud Health Technol Inform*, 2009. **144**: p. 22-6.
123. Matthias, A., *Robot lies in health care: when is deception morally permissible?* *Kennedy Institute of Ethics Journal*, 2015. **25**(2): p. 169-162.
124. Migneault, J.P., et al., *How to write health dialog for a talking computer*. *Journal of biomedical informatics*, 2006. **39**(5): p. 468-481.
125. Powers, D.M., et al. *MANA for the Ageing*. in *Proceedings of the 2010 Workshop on Companionable Dialogue Systems*. 2010. Association for Computational Linguistics.
126. Riccardi, G. *Towards healthcare personal agents*. in *Proceedings of the 2014 Workshop on Roadmapping the Future of Multimodal Interaction Research including Business Opportunities and Challenges*. 2014. ACM.



127. Rojas-Barahona, L.M. and T. Giorgino. *AdaRTE: Adaptable Dialogue Architecture and Runtime Engine-a New Architecture for Health-care Dialogue Systems*. in *Medinfo 2007: Proceedings of the 12th World Congress on Health (Medical) Informatics; Building Sustainable Health Systems*. 2007. IOS Press.
128. Rojas-Barahona, L.M. and T. Giorgino, *Adaptable dialog architecture and runtime engine (AdaRTE): a framework for rapid prototyping of health dialog systems*. international journal of medical informatics, 2009. **78**: p. S56-S68.
129. Romeo T. *Automating the patient financial assistance process to improve patient satisfaction at Trinity Health*. Health Management Technology 2018;39(2):26-26
130. Schlangen, D. *The future of spoken dialogue systems is in their past: long-term adaptive, conversational assistants*. in *NAACL-HLT Workshop on Future directions and needs in the Spoken Dialog Community: Tools and Data*. 2012. Association for Computational Linguistics.
131. Sidner, C.L., et al. *A Robotic Companion for Social Support of Isolated Older Adults*. in *HRI (Extended Abstracts)*. 2015.
132. Tartaro, A. *Authorable virtual peers for children with autism*. in *CHI'07 extended abstracts on Human factors in computing systems*. 2007. ACM.
133. Thompson, D., et al., *Use of relational agents to improve family communication in type 1 diabetes: methods*. JMIR research protocols, 2016. **5**(3).
134. Torjesen I. *Sixty seconds on . . . GP chatbot*. BMJ (Clinical research ed.) 2018;362:k2897
135. Vogeley, K. and G. Bente, "*Artificial humans*": *Psychology and neuroscience perspectives on embodiment and nonverbal communication*. Neural Networks, 2010. **23**(8): p. 1077-1090.
136. Weaver, K., A. Komlodi, and B. Duffy. *Using an intelligent interviewer to perform cognitive assessments*. in *CHI'13 Extended Abstracts on Human Factors in Computing Systems*. 2013. ACM.
137. Wiemer-Hastings, K., et al., *Automatic classification of dysfunctional thoughts: a feasibility test*. Behavior Research Methods, 2004. **36**(2): p. 203-212.
138. Wilson C. *Is a chatbot doctor as good as a human?* New Scientist 2018;239(3185):25-25
139. Wolters, M., et al., *Being old doesn't mean acting old: How older users interact with spoken dialog systems*. ACM Transactions on Accessible Computing (TACCESS), 2009. **2**(1): p. 2.
140. Young, V., E. Rochon, and A. Mihailidis, *Exploratory analysis of real personal emergency response call conversations: considerations for personal emergency response spoken dialogue systems*. Journal of neuroengineering and rehabilitation, 2016. **13**(1): p. 97.

### Personalization:

141. Beveridge M, Fox J. *Automatic generation of spoken dialogue from medical plans and ontologies*. J Biomed Inform 2006;39(5):482-99.
142. Bickmore TW, Trinh H, Olafsson S, et al. *Patient and Consumer Safety Risks When Using Conversational Assistants for Medical Information: An Observational Study of Siri, Alexa, and Google Assistant*. J Med Internet Res 2018;20(9):e11510.
143. Crutzen R, Peters GJ, Portugal SD, Fisser EM, Grolleman JJ. *An artificially intelligent chat agent that answers adolescents' questions related to sex, drugs, and alcohol: an exploratory study*. J Adolesc Health 2011;48(5):514-9.
144. Griol D, Carbo J, Lopez JM. *An Automatic Dialog Simulation Technique to Develop and Evaluate Interactive Conversational Agents*. J Appl. Artif. Intell 2013;27(9):759-80.
145. Ireland D, Atay C, Liddle J, et al. *Hello Harlie: Enabling Speech Monitoring Through Chat-Bot Conversations*. Stud Health Technol Inform 2016;227:55-60
146. Lucas GM, Rizzo A, Gratch J, et al. *Reporting mental health symptoms: breaking down barriers to care with virtual human interviewers*. Frontiers in Robotics and AI. 2017;4:51
147. Luerssen MH, Hawke T. *Virtual Agents as a Service: Applications in Healthcare. Proceedings of the 18th International Conference on Intelligent Virtual Agents*. Sydney, NSW, Australia: ACM, 2018:107-12.
148. Liu B, Sundar SS. *Should Machines Express Sympathy and Empathy? Experiments with a Health Advice Chatbot*. Cyberpsychology, Behavior, and Social Networking 2018;21(10):625-36.
149. Miner AS, Milstein A, Schueller S, Hegde R, Mangurian C, Linos E. *Smartphone-Based Conversational Agents and Responses to Questions About Mental Health, Interpersonal Violence, and Physical Health*. JAMA Intern Med 2016;176(5):619-25.
150. Philip P, Micoulaud-Franchi JA, Sagaspe P, et al. *Virtual human as a new diagnostic tool, a proof of concept study in the field of major depressive disorders*. Sci Rep 2017;7:42656.
151. Philip P, Bioulac S, Sauteraud A, Chaufon C, Olive JJPt, environments v. *Could a virtual human be used to explore excessive daytime sleepiness in patients? Presence: teleoperators and virtual environments*. 2014;23(4):369-76
